# Supplementary material
Source: PubMed Central journal article supplement (PMC283573)

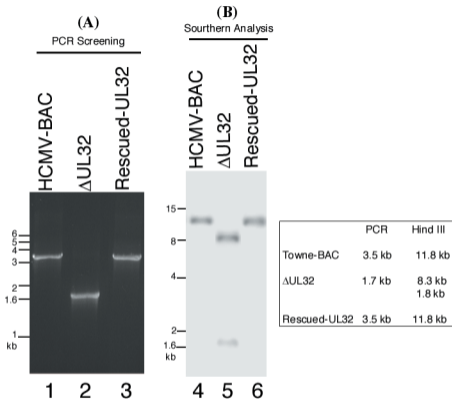

Supplement: pnas_100_24_14223__4.pdf [file pnas_100_24_14223__4.pdf]

HCMV-BAC

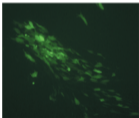

$\Delta$ UL32

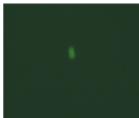

Rescued-UL32

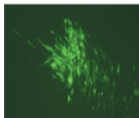

Supplement: pnas_100_24_14223__5.pdf [file pnas_100_24_14223__5.pdf]
